# Supplementary material for: A sustainable approach for smallholder farmers: evaluation of plant by-products and industrial waste in wheat cultivation
Source: PeerJ. 2025 Jul 29;13:e19775. doi: 10.7717/peerj.19775 (PMC12315826; doi:10.7717/peerj.19775)
Supplement: Supplemental Information 2 [file peerj-13-19775-s002.xlsx]

## Sheet: Sayfa1
treatm.	rep.	emergence days	seedling plant hei.	stem elo. Plant. Heig.	heaidng heig.	harvesting plant hei.	tillers number	tillering days	stem elo. Days	heading days	flag leaf cm	spike cm	grain per spike	thousand grain gr	grain protein cont	N cont	plant number per squer m	yiled kg/da	SPAD
1	1	9	14.2	38.5	65.25	79.12	4	79	91	192	13.26	8.1	21	33.64	15.12	1.71	412	229.2	53.19
1	2	8	14.1	36.4	64.35	78.45	5	78	92	191	14.23	7.8	23	30.39	16.02	1.69	421	225	54.76
1	3	8	16.12	35.16	66.84	80.13	3	76	90	189	15.12	7.6	21	34.15	14.59	1.73	423	232.4	52.18
1	4	8	15.4	39.24	63.21	82.16	4	74	91	192	14.61	8	20	35.35	15.02	1.81			54.91
1	5	9	13.35	37.5	67.15	79.67	3	79	93	190	13.89	7.4	23	34.61	15.31	1.74			53.34
1	6	8	14.65	41.12	63.48	81.32	5	76	90	188	16.13	6.9	24	31.16	14.92	1.61			54.12
1	7	8	13.91	38.64	65.38	78.81	4	78	89	193	13.06	7.1	23	32.81	15.81	1.82			53.91
1	8	8	15.13	37.13	65.91	77.91	3	79	91	187	15.73	7.5	19	34.09	16.12	1.71			52.1
1	9	9	14.12	36.84	66.34	80.34	4	76	93	193	14.81	6.8	21	32.18	14.91	1.69			51.84
1	10	8	16.34	39.13	61.37	81.39	5	77	92	192	13.61	8.2	20	31.19	14.71	1.82			52.03
1	11	8	15.37	35.76	62.38	80.37	3	79	90	190	14.17	6.4	23	29.81	15.18	1.67			62.18
1	12	9	14.91	37.12	64.98	77.81	4	77	89	192	13.61	6.9	24	33.61	13.61	1.92			64.31
1	13	9	13.39	34.68	64.38	76.91	3	75	91	191	15.15	8.6	21	31.81	14.37	1.76			63.19
1	14	8	15.32	35.81	66.91	78.08	3	76	93	189	13.05	7.4	20	30.92	14.09	1.72			51.84
1	15	9	14.34	33.89	65.81	79.1	3	78	92	192	14.51	7.9	22	35.91	14.91	1.84			52.03
	Avg	8.4	14.71	37.128	64.916	79.438	3.73333	77.1333	91.1333	190.733	14.3293	7.50667	21.6667	32.7753	14.9793	1.74933	418.667	228.867	55.062
2	1	6	17.15	39.52	64.98	81.34	4	78	94	193	14.92	6.9	23	34.15	14.25	1.92		235.9	66.81
2	2	7	18.05	41.24	69.24	83.45	4	76	93	192	14.85	7.1	20	36.12	15.31	1.89			59.83
2	3	7	17.32	39.84	66.81	83.13	4	75	92	190	15.67	6.8	21	33.15	14.02	1.82	436		64.19
2	4	6	16.39	40.1	64.27	80.61	5	77	93	189	16.81	7.4	24	32.89	14.21	1.76	434	239.4	67.02
2	5	7	17.64	42.13	68.83	82.42	5	79	94	191	16.06	6.7	23	35.18	14.13	1.8	444	231.3	64.86
2	6	8	16.34	41.34	65.91	79.13	3	75	91	189	15.31	7	22	32.76	15.76	1.72			65.49
2	7	5	17.64	40.57	66.76	82.61	4	77	92	192	16.32	7.3	24	35.61	14.61	1.82			66.31
2	8	6	16.13	39.61	67.81	79.35	3	76	93	190	14.91	6.8	21	34.81	13.91	1.49			54.91
2	9	6	17.34	40.37	69.13	80.76	5	79	93	191	15.61	6.5	22	32.34	14.52	1.83			53.34
2	10	5	16.38	42.1	65.73	81.66	4	78	92	189	16.31	7.4	23	36.61	14.34	1.92			54.12
2	11	7	17.36	41.31	64.92	83.31	3	76	91	192	16.72	7.1	24	35.98	14.82	1.78			51.84
2	12	6	17.29	38.16	66.92	82.42	4	77	92	193	14.81	6.5	20	34.96	14.36	1.82			52.03
2	13	7	16.81	37.92	67.16	83.16	3	79	90	190	14.82	6.8	21	33.82	14.06	1.56			67.02
2	14	7	18.31	39.82	68.31	82.46	4	78	93	189	15.93	7.3	23	32.76	14.25	1.61			64.86
2	15	7	18.12	42.16	65.74	82.94	5	77	94	194	16.37	7.5	24	33.64	14.74	1.69			67.1
	Avg	6.46667	17.218	40.4127	66.8347	81.9167	4	77.1333	92.4667	190.933	15.6947	7.00667	22.3333	34.3187	14.486	1.762	438	235.533
3	1	9	15.32	36.41	62.35	81.31	4	73	91	187	17.81	7.4	24	36.18	14.81	1.93	439		64
3	2	8	16.81	34.92	64.81	77.76	5	75	92	189	17.21	6.9	23	34.81	14.31	1.82		246.1	63.31
3	3	7	16.52	36.81	65.64	78.91	6	76	93	189	16.8	7.2	24	37.16	14.14	1.84			62.18
3	4	8	18.65	35.68	67.12	74.68	5	74	92	190	18.15	6.8	26	36.91	15.12	1.9	451	251.6	59.46
3	5	9	14.25	37.64	64.32	76.85	4	73	94	190	16.15	7.1	23	37.19	15.04	1.81	449	249.9	55.91
3	6	8	15.32	35.61	63.81	79.91	6	74	90	192	17.82	8.1	22	35.61	16.21	1.76			57.48
3	7	7	14.92	36.82	65.93	80.64	5	75	92	190	15.92	7.8	20	35.82	15.19	1.83			56.83
3	8	8	16.61	34.93	66.87	76.16	4	72	92	189	16.82	7.9	23	36.2	15.89	1.72			61.34
3	9	7	17.16	36.82	67.18	75.92	5	75	93	187	15.98	6.8	24	35.82	15.61	1.7			58.14
3	10	9	15.67	37.49	65.92	78.92	6	74	94	187	17.1	7.4	22	38.1	15.64	1.85			57.16
3	11	9	15.82	36.93	66.19	81.32	4	76	94	188	16.85	7.3	23	37.28	16.15	1.92			53.34
3	12	8	17.61	35.89	63.98	76.16	4	74	95	189	16.5	8	24	34.92	14.92	1.74			54.12
3	13	9	17.78	37.34	64.81	75.92	4	75	95	188	17	6.9	25	36.82	15.68	1.83			51.84
3	14	8	16.93	38.12	63.16	74.8	5	75	91	192	16.6	7	26	35.82	14.1	1.89			67.02
3	15	9	17.83	38.91	63.31	74.5	4	75	94	190	17.59	7.5	28	36.8	14.05	1.92			64.86
	Avg	8.2	16.48	36.688	65.0267	77.584	4.73333	74.4	92.8	189.133	16.9533	7.34	23.8	36.3627	15.124	1.83067	446.333	249.2
4	1	7	18.16	36.12	61.18	74.91	6	74	92	187	18.13	7.8	26	38.16	16.06	2.02	461		67.02
4	2	7	19.64	38.12	66.82	80.12	5	75	90	185	18.1	8	28	37.61	15.64	1.92	452	261.6	68.97
4	3	8	17.16	33.15	64.34	76.13	6	76	91	186	17.12	8.3	27	35.64	14.64	1.89			66.49
4	4	7	17.89	34.31	62.71	75.63	5	72	90	183	16.2	8.6	27	37.62	15.31	1.95		268.5	64.86
4	5	8	16.35	33.08	62.86	76.79	5	73	93	186	15.82	8.4	25	36.48	15.13	2.12	459	264.8	65.19
4	6	7	15.89	32.91	63.87	79.81	5	73	90	184	16.81	8.9	27	38.91	15.95	1.95			63.76
4	7	6	16.81	33.61	65.5	77	6	74	89	184	17.03	8.5	24	38.64	15.5	1.97			67.16
4	8	8	17.34	31.82	61.89	78.19	6	74	91	185	15.84	8.4	28	37.91	15.96	1.9			68.92
4	9	6	16.76	33.82	64.18	81.64	5	75	91	186	16.21	7.9	23	34.39	15.31	2.2			67.19
4	10	6	16.81	34.92	65.92	76.94	4	76	89	186	15.81	8	24	36.59	15.28	1.93			66.68
4	11	8	18.34	35.82	63.64	78.16	5	74	89	185	17.5	7.9	23	37.16	15.81	1.9			58.95
4	12	7	18.09	36.4	65.81	75.34	4	75	88	187	18.15	7.6	24	38.61	14.89	1.92			64.5
4	13	7	17.82	37.13	64.72	74.81	4	75	89	186	16.86	7.5	23	37.82	15.34	2.12			66.3
4	14	6	18.39	37.89	63.34	73.61	6	73	90	187	17.35	7.3	22	36.66	16.15	2.08			61.8
4	15	7	17.98	37.5	62.76	74.5	5	73	91	185	17.69	8.6	27	38.12	16.08	1.97			68.3
	Avg	7	17.562	35.1067	63.9693	76.9053	5.13333	74.1333	90.2	185.467	16.9747	8.11333	25.2	37.3547	15.5367	1.98933	457.333	264.967
