# Supplementary material for: A sustainable approach for smallholder farmers: evaluation of plant by-products and industrial waste in wheat cultivation
Source: PeerJ. 2025 Jul 29;13:e19775. doi: 10.7717/peerj.19775 (PMC12315826; doi:10.7717/peerj.19775)
Supplement: Supplemental Information 3 [file peerj-13-19775-s003.xlsx]

## Sheet: Sayfa1
Grow stage	Treatment	Rep.	emergence days	Plant height	spad	PROLİN	MDA	RWC		tiller	tillering days	stem elo. Days	heading days	flag leaf cm	spike heig.	Num. grain per spike	thousand weights	grain protein cont.	grain N cont.
1	1	1	9	12.9	41.31	3.12	8.91	71.31		2	66	89	180	11.62	6.5	17	31.12	13.65	1.81
1	1	2	8	12.8	42.26	3.87	8.15	74.61		3	68	88	182	12.64	6.9	19	29.85	14.12	1.83
1	1	3	8	11.8	41.12	4.12	10.18	70.68		2	66	87	183	12.15	6.2	16	32.61	14.06	1.89
1	1	4	8	10.3	44.3	2.45	9.45	72.16		2	68	88	181	13.25	7.1	15	33.15	15.16	1.79
1	1	5	9	12.5	43.21	2.87	11.18	73.68		3	67	87	182	13.08	6.5	16	30.18	15.34	1.76
1	2	1	6	15.3	45.31	3.23	15.93	72.01		2	65	87	180	13.17	7.1	17	32.12	14.71	1.92
1	2	2	7	14.9	44.21	3.01	14.85	72.61		2	64	87	182	13.61	6.9	18	29.15	14.82	1.89
1	2	3	7	14.3	44.84	4.21	16.48	74.23		2	65	88	182	12.05	7.3	16	31.38	15.16	1.82
1	2	4	6	15.4	45.64	4.1	16.74	70.36		3	64	86	181	11.98	7.4	17	30.81	15.84	1.76
1	2	5	7	13.4	46.12	3.95	17.48	72.82		3	63	87	180	12.97	6.8	18	32.3	14.42	1.8
1	3	1	9	13.5	43.12	4.51	10.76	74.61		2	63	85	175	14.65	7.2	17	34.21	15.1	1.93
1	3	2	8	12.8	42.31	6.23	12.34	75.82		3	64	84	176	15.13	7.3	18	31.81	14.45	1.82
1	3	3	7	10.8	42.48	5.56	9.18	74.92		3	65	85	173	14.67	7.1	19	30.38	13.95	1.84
1	3	4	8	10.3	41.76	6.01	8.45	76.82		3	67	84	175	13.38	6.8	16	33.18	15.64	1.9
1	3	5	9	11.5	41.45	5.23	7.18	73.15		2	65	82	173	14.85	7.3	18	32.76	14.82	1.81
1	4	1	7	14.2	46.12	7.21	18.64	71.03		3	63	81	171	16.12	7.6	20	36.31	16.15	2.02
1	4	2	7	15.8	45.74	8.03	18.1	74.06		3	62	82	169	15.84	7.9	21	35.15	17.32	1.92
1	4	3	8	16.3	44.31	7.96	17.93	73.57		3	62	83	169	14.89	8.3	24	34.28	15.98	1.89
1	4	4	7	15.5	45.67	8.23	20.18	72.3		3	61	83	168	15.68	8.1	22	33.34	16.46	1.95
1	4	5	8	14.5	46.31	7.64	17.48	70.16		3	60	82	171	16.64	8.3	23	35.76	17.29	2.12
		AVG	7.65	13.44	43.8795	5.077	13.4795	73.0455		2.6	64.4	85.25	176.65	13.9185	7.23	18.35	32.4925	15.222	0
2	1	1		13.8	51.31	10.32	11.76	68.71
2	1	2		14.5	52.12	9.35	16.21	71.01
2	1	3		16.12	49.48	6.23	14.84	72.15
2	1	4		12.16	53.45	8.23	12.48	70.552
2	1	5		15.45	42.48	12.01	13.82	71.62
2	2	1		17.15	54.12	10.43	14.34	69
2	2	2		18.05	51.24	9.23	13.48	72.06
2	2	3		16.5	53.16	11.43	12.64	71.13
2	2	4		15.74	51.16	10.67	13.48	70.34
2	2	5		16.68	53.26	9.84	18	69.64
2	3	1		18.15	55.61	7.23	17.64	72.64
2	3	2		17.95	53.74	6.98	15.65	76.34
2	3	3		15.96	58.14	8.61	18.94	74.35
2	3	4		18.65	56.47	7.82	21.18	73.68
2	3	5		19.5	57.58	7.53	20.48	75.02
2	4	1		19.68	58.41	7.85	17.45	76.15
2	4	2		20.25	57.84	8.45	15.64	74.92
2	4	3		21.05	59.45	8.31	18.37	74.1
2	4	4		17.89	57.81	9.02	16.48	76.51
2	4	5		18.95	56.92	10.35	16.31	72.34
				17.209	54.1875	8.9945	15.9595	72.6131
3	1	1		35.9	53.15	12.98	9.8	78.25
3	1	2		37.8	51.12	16.61	9.18	79.34
3	1	3		34.6	52.16	10.82	11.45	76.06
3	1	4		36.05	53.49	14.34	12.48	75.98
3	1	5		36.8	50.93	11.64	10.82	77.62
3	2	1		34.9	58.45	14.23	12.06	74.59
3	2	2		35.9	56.15	15.83	10.78	76.98
3	2	3		38.9	57.64	11.89	9.92	75.98
3	2	4		40.1	59.12	10.36	12.45	77.85
3	2	5		36.4	57.13	15.93	10.03	76.03
3	3	1		32.95	60.13	10.74	11.19	79.52
3	3	2		33.95	60.81	13.71	16.42	78.46
3	3	3		34.95	62.15	9.86	14.32	79.98
3	3	4		36.05	59.84	12.83	12.48	81.24
3	3	5		34.52	63.18	10.23	10.1	77.98
3	4	1		34.6	62.15	11.23	9.43	76.98
3	4	2		35.1	64.25	12.83	11.54	82.64
3	4	3		32.9	65.74	9.18	10.24	81.42
3	4	4		35.1	65.21	14.56	9.46	80.88
3	4	5		32.4	68.12	13.77	12.83	79.92
				35.4935	59.046	12.6785	11.349	78.385
4	1	1		52.65	53.19	16.82	12.34	74.54
4	1	2		53.65	54.76	19.2	16.42	72.95
4	1	3		53.15	52.18	18.23	14.02	76.78
4	1	4		56.52	54.91	20.62	10.64	78.85
4	1	5		52.21	53.34	18.23	11.2	78.9
4	2	1		56.42	54.12	15.82	14.31	77.85
4	2	2		53.26	53.91	16.64	12.08	79.1
4	2	3		54.85	52.1	18.23	10.42	75.46
4	2	4		51.68	51.84	17.23	9.83	76.81
4	2	5		57.52	52.03	13.19	11.19	78.62
4	3	1		52.24	62.18	15.32	16.49	79.84
4	3	2		54.52	64.31	16.23	18.42	81.12
4	3	3		53.64	63.19	13.97	11.099	82.35
4	3	4		58.45	66.81	10.23	13.04	78.82
4	3	5		57.85	59.83	15.82	10.71	79.12
4	4	1		51.26	64.19	12.85	13.81	83.12
4	4	2		53.84	67.02	11.95	10.92	80.42
4	4	3		54.65	64.86	13.76	14.06	79.21
4	4	4		52.45	65.49	15.74	12.81	83.62
4	4	5		53.98	66.31	11.62	11.09	82.13
				54.2395	58.8285	15.585	12.7449	78.9805
